# Supplementary material for: Remimazolam Protects Against LPS-Induced Endotoxicity Improving Survival of Endotoxemia Mice
Source: PubMed Central journal article supplement (PMC8641375; doi:10.3389/fphar.2021.739603), 2021-11-19
Supplement: Table1.pdf [file Table1.pdf]

Supplementary Table S1.

|               | Forward Primer          | Reverse Primer        |
|---------------|-------------------------|-----------------------|
| TNF- $\alpha$ | CCCTCACACTCAGATCATCTTCT | GCTACGACGTGGGCTACAG   |
| IL-6          | TAGTCCTTCCTACCCCAATTTC  | TTGGTCCTTAGCCACTCCTTC |
| IL-1 $\beta$  | GCAACTGTTCTGAACTCAACT   | ATCTTTTGGGGTCCGTCAACT |
